# Supplementary material for: Improving the accuracy of solid-state nuclear magnetic resonance chemical shift prediction with a simple molecular correction
Source: Royal Society of Chemistry journal article supplement (doi:10.1039/c9cp01666j), 2019-01-01
Supplement: c9cp01666j1.pdf [file c9cp01666j1.pdf]

**Improving the accuracy of solid-state nuclear magnetic resonance chemical  
shift prediction with a simple molecular correction**

Martin Dračínský,<sup>a</sup> Pablo Unzueta,<sup>b</sup> Gregory Beran<sup>b</sup>

<sup>a</sup>*Institute of Organic Chemistry and Biochemistry, AS CR, Flemingovo 2, Prague, Czech Republic*

<sup>b</sup>*Department of Chemistry, University of California, Riverside, California 92521, USA*

**Electronic Supplementary Information**

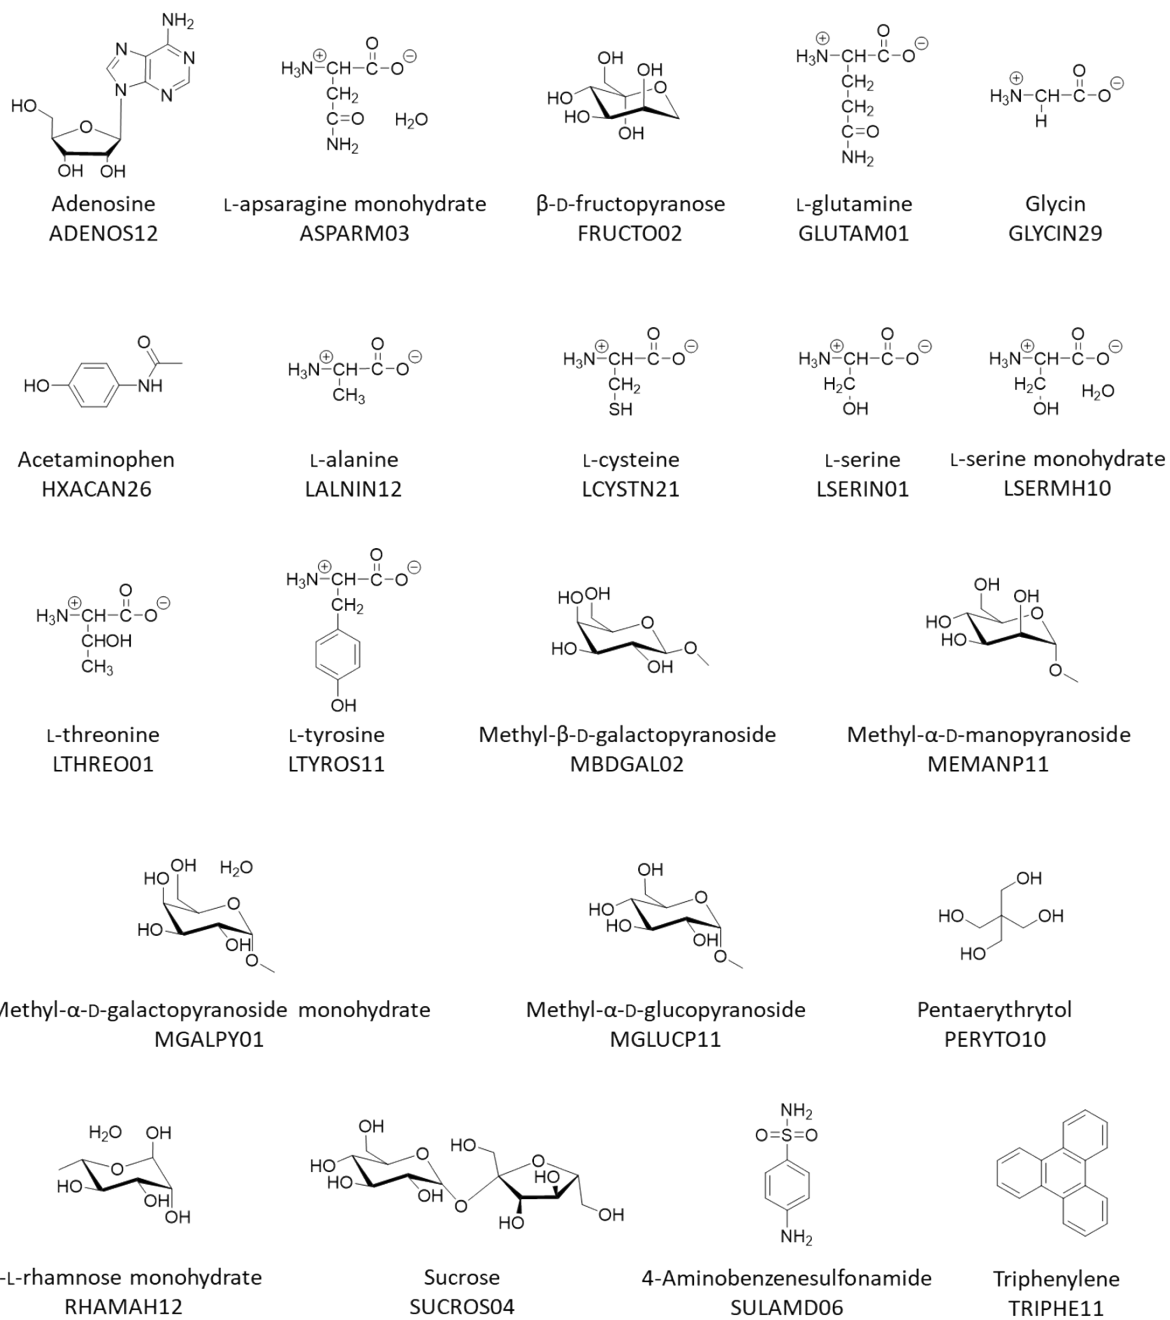

Figure S1. Crystal structures and corresponding CSD reference codes included in the  $^{13}\text{C}$  benchmark set.

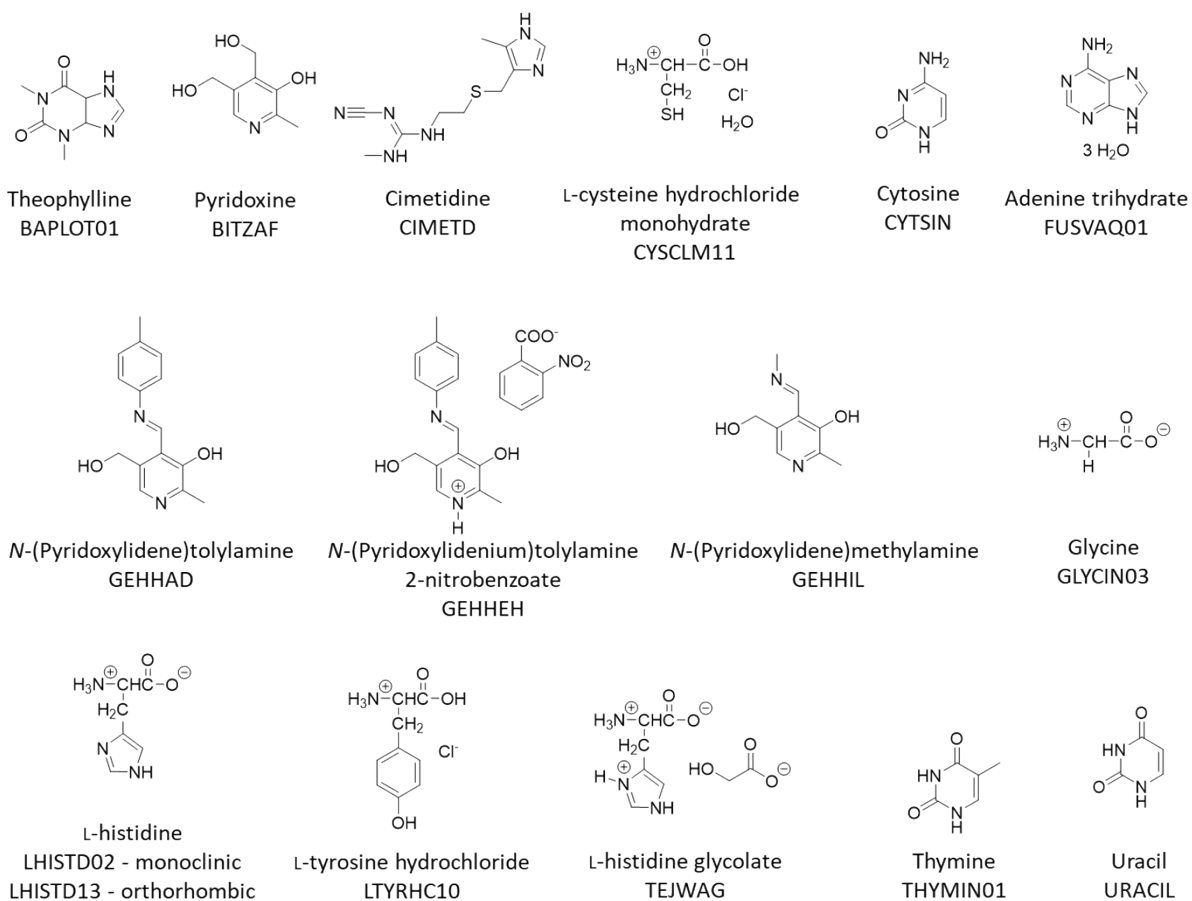

Figure S2. Crystal structures and corresponding CSD reference codes included in the  $^{15}\text{N}$  benchmark set.

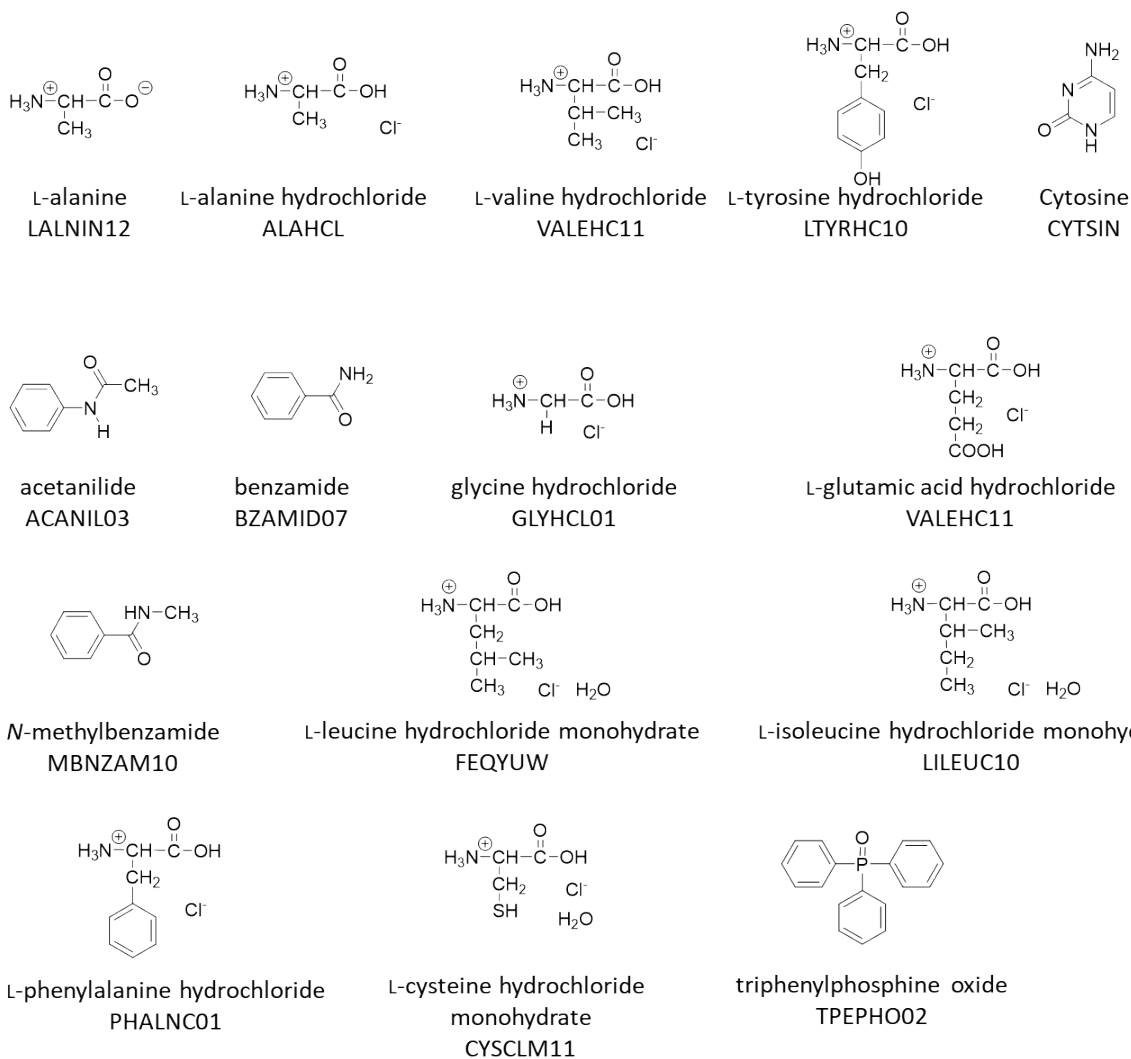

Figure S3. Crystal structures and corresponding CSD reference codes included in the  $^{17}\text{O}$  benchmark set.

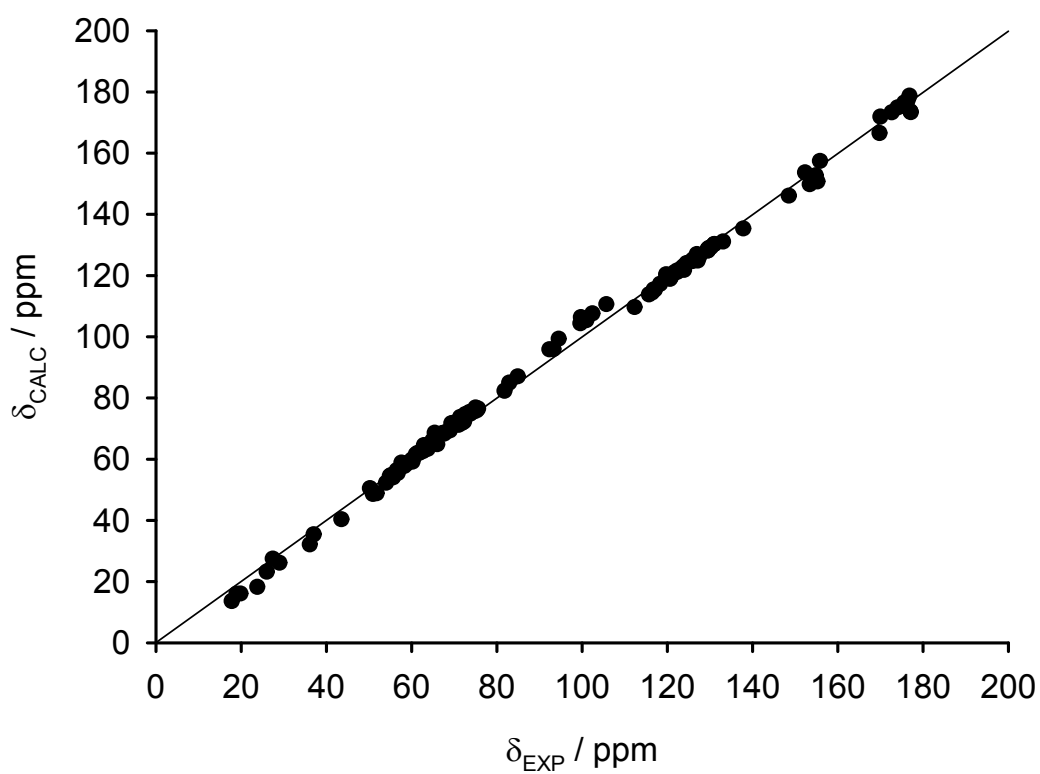

Figure S4. The correlation between the uncorrected GIPAW-calculated and experimental chemical shifts in the carbon benchmark set.

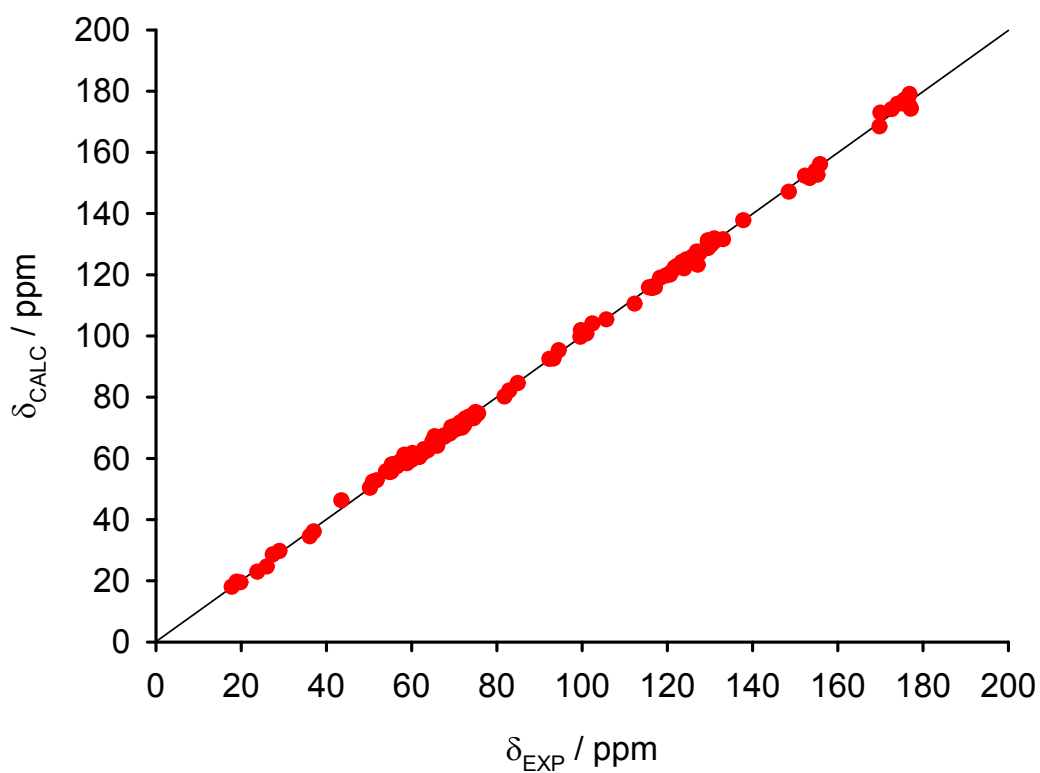

Figure S5. The correlation between PBE0-corrected and experimental chemical shifts in the carbon benchmark set.

Table S1. The parameters of the linear correlation between experimental chemical shifts and calculated shieldings (GIPAW, SCRMP and GIPAW calculations corrected with monomer corrections calculated with various basis sets).

| Method             | <sup>13</sup> C |           | <sup>15</sup> N |           | <sup>17</sup> O |           |
|--------------------|-----------------|-----------|-----------------|-----------|-----------------|-----------|
|                    | Slope           | Intercept | Slope           | Intercept | Slope           | Intercept |
| GIPAW              | -1.004          | 170.443   | -0.970          | 180.160   | -0.927          | 232.940   |
| SCRMP              | -1.034          | 185.711   | -0.985          | 193.429   | -0.958          | 257.794   |
| PBE0/6-311+G(2d,p) | -1.062          | 180.005   | -1.025          | 189.954   | -1.024          | 261.767   |
| PBE0/6-31G(p)      | -1.067          | 179.615   | -1.031          | 190.177   | -1.028          | 262.963   |
| PBE0/pcSseg1       | -1.066          | 180.948   | -1.025          | 190.304   | -1.026          | 263.197   |
| PBE0/pcSseg2       | -1.061          | 181.045   | -1.023          | 191.020   | -1.022          | 263.152   |
| PBE0/pcSseg3       | -1.061          | 180.838   | -1.024          | 191.016   | -1.021          | 262.216   |

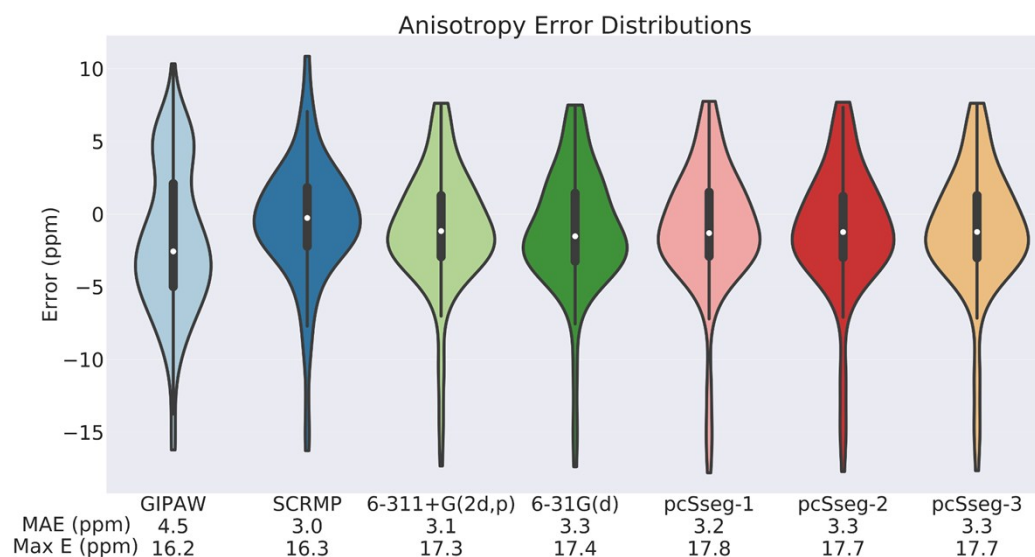

Figure S6. Errors in reproducing the experimental  $^{13}\text{C}$  anisotropy calculated from the principal components.

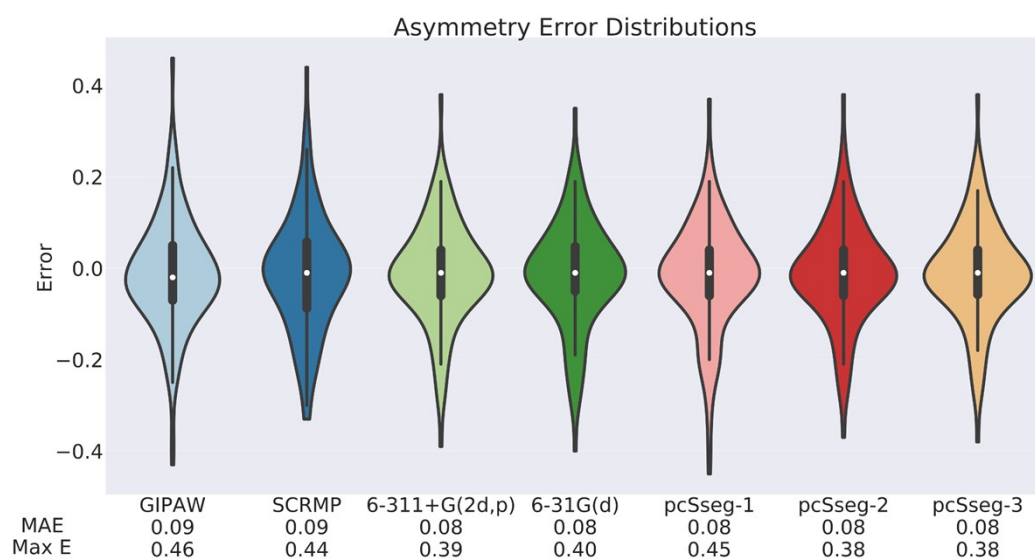

Figure S7. Errors in reproducing the experimental  $^{13}\text{C}$  asymmetry calculated from the principal components.

To complement Figure 2 in the main paper, Figures S6 and S7 plot the error distributions for the chemical shielding anisotropy and asymmetry relative to experiment. These were computed from the principal components of the shielding tensor according to the Haeberlen convention:

$$|\delta_{zz}-\delta_{iso}| \geq |\delta_{xx}-\delta_{iso}| \geq |\delta_{yy}-\delta_{iso}|$$

$$\text{Isotropic: } \delta_{iso} = (\delta_{11} + \delta_{22} + \delta_{33})/3$$

$$\text{Anisotropy: } \delta = 3(\delta_{zz}-\delta_{iso})/2$$

$$\text{Asymmetry: } \eta = (\delta_{yy} - \delta_{xx}) / \delta$$

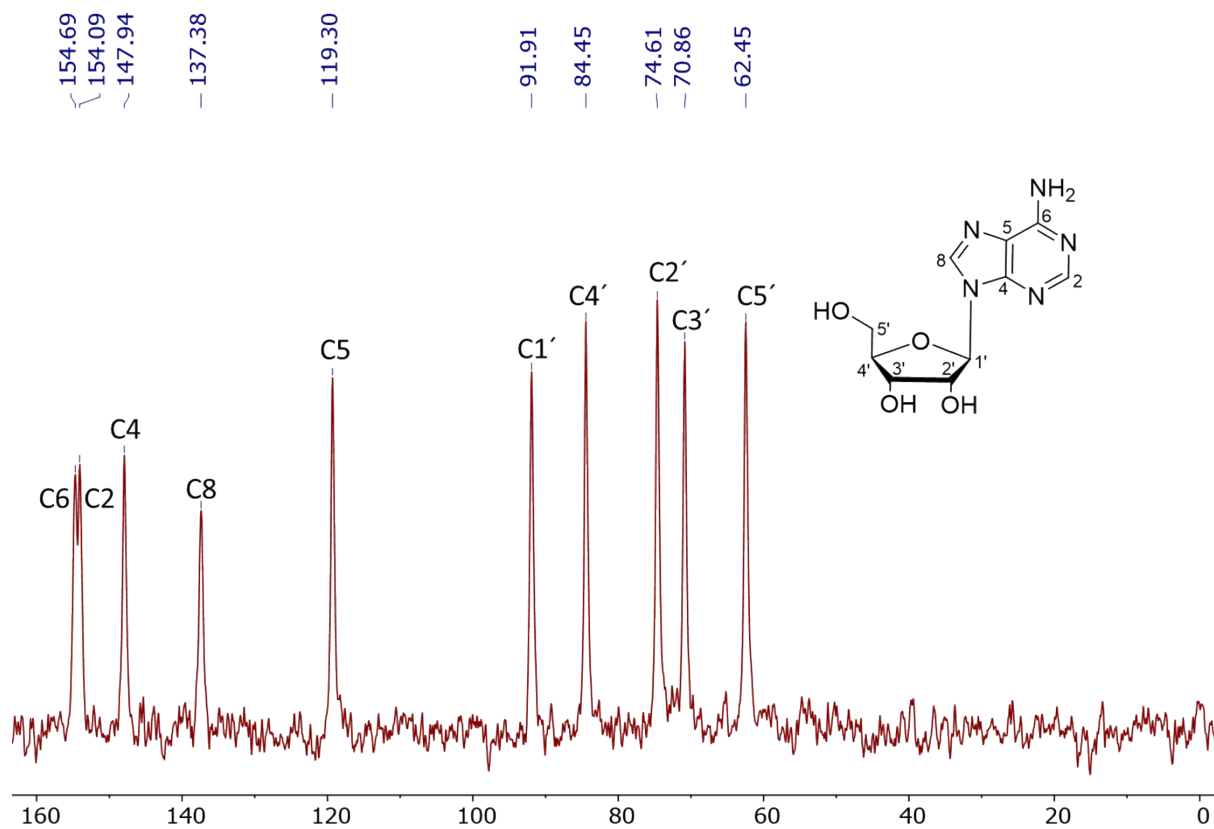

Figure S8.  $^{13}\text{C}$  CP-MAS spectrum of adenosine.

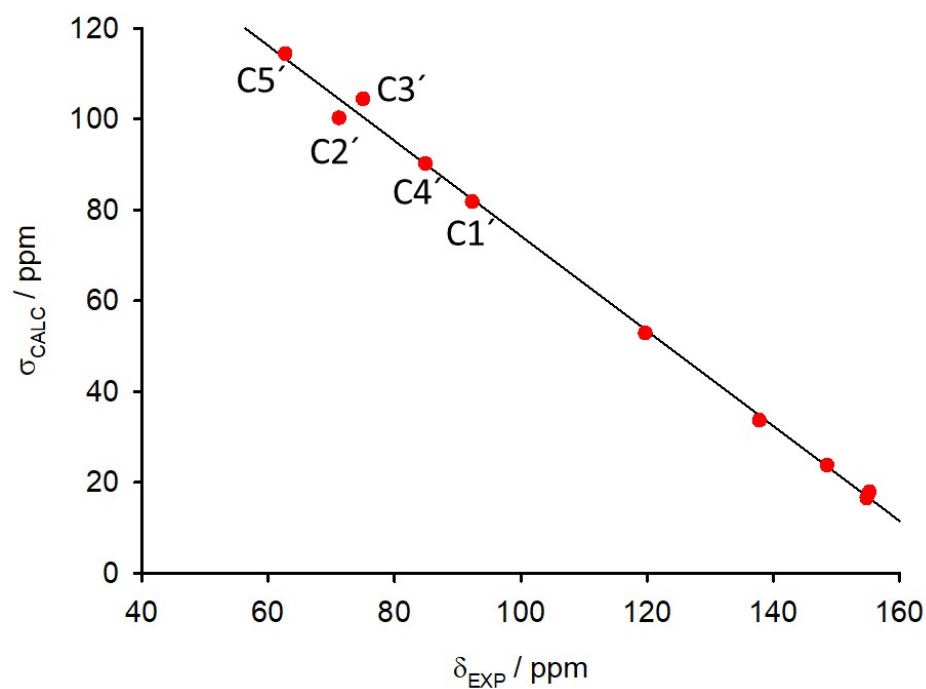

Figure S9. The correlation between calculated NMR shieldings and experimental shifts in adenosine. The original signal assignment of C2' and C3' is used in this plot.



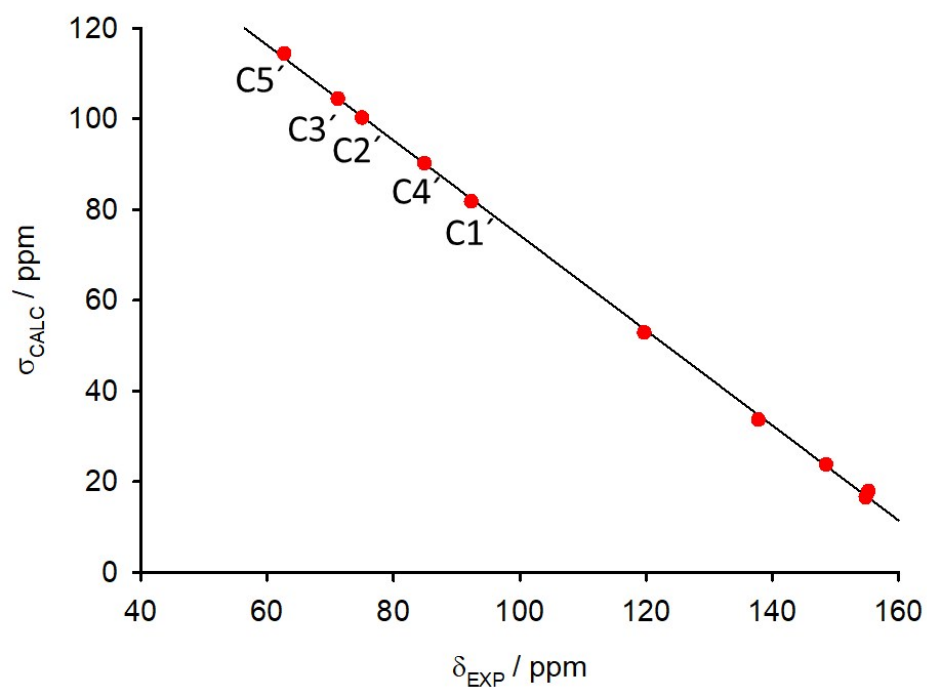

Figure S10. The correlation between calculated NMR shieldings and experimental shifts in adenosine. The new signal assignment of C2' and C3' is used in this plot.

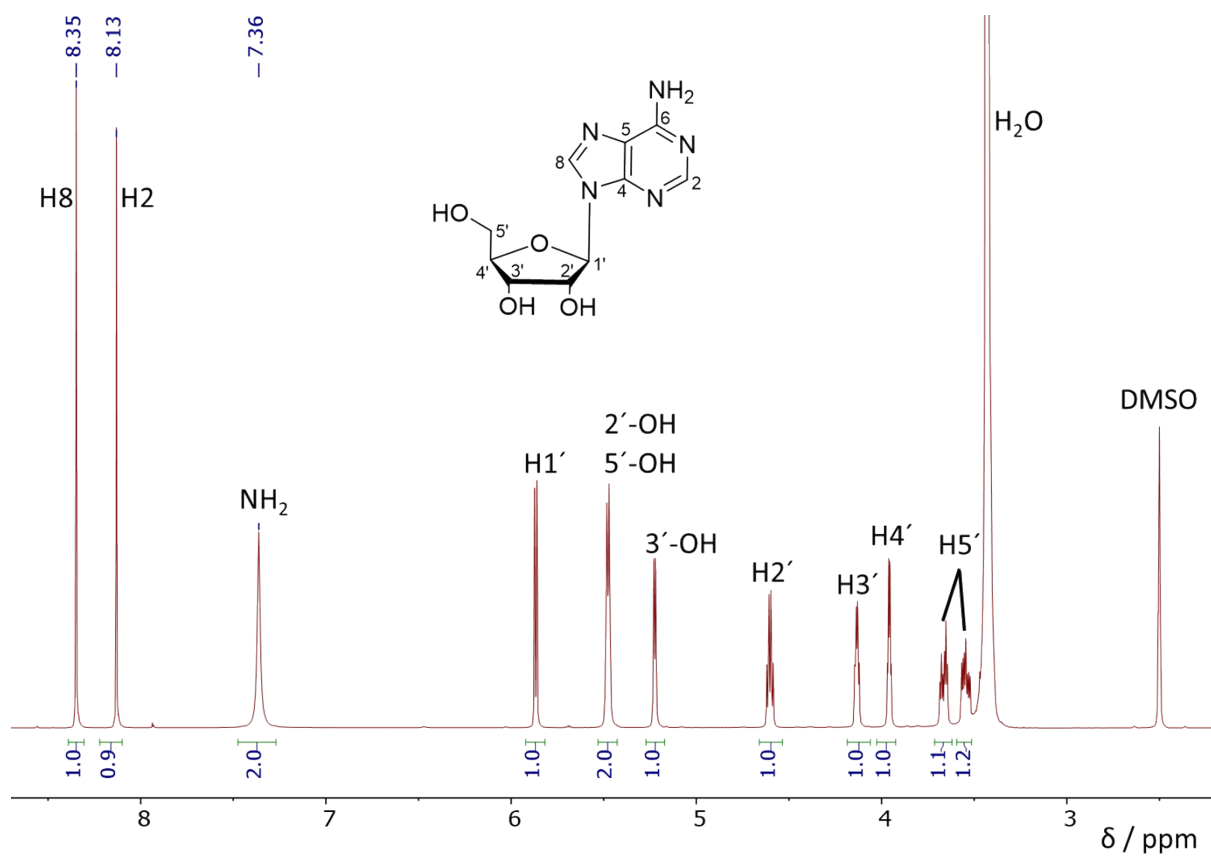

Figure S11.  $^1\text{H}$  NMR spectrum of adenosine in  $\text{DMSO-}d_6$  with signal assignment.

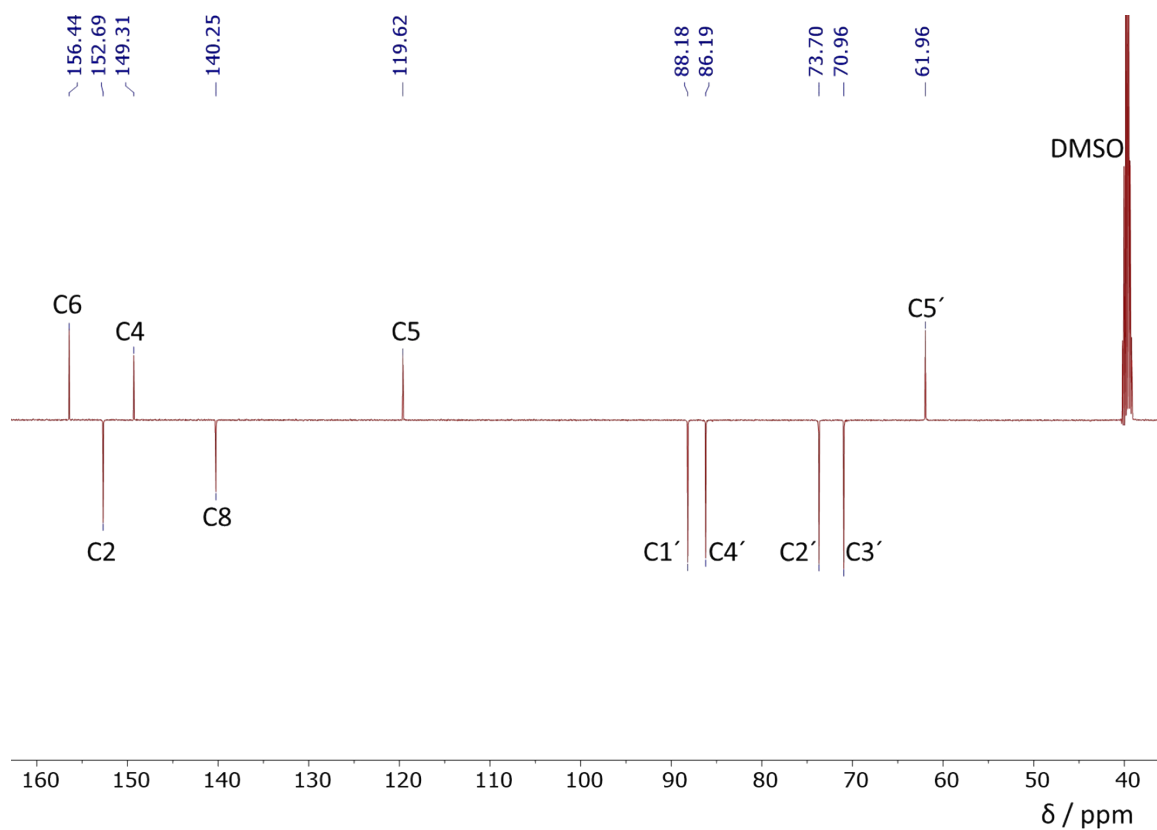

Figure S12.  $^{13}\text{C}$  attached proton test (APT) NMR spectrum of adenosine in  $\text{DMSO-}d_6$  with signal assignment. Negative signals correspond to CH and  $\text{CH}_3$  groups, positive signals correspond to  $\text{CH}_2$  and quaternary carbons.

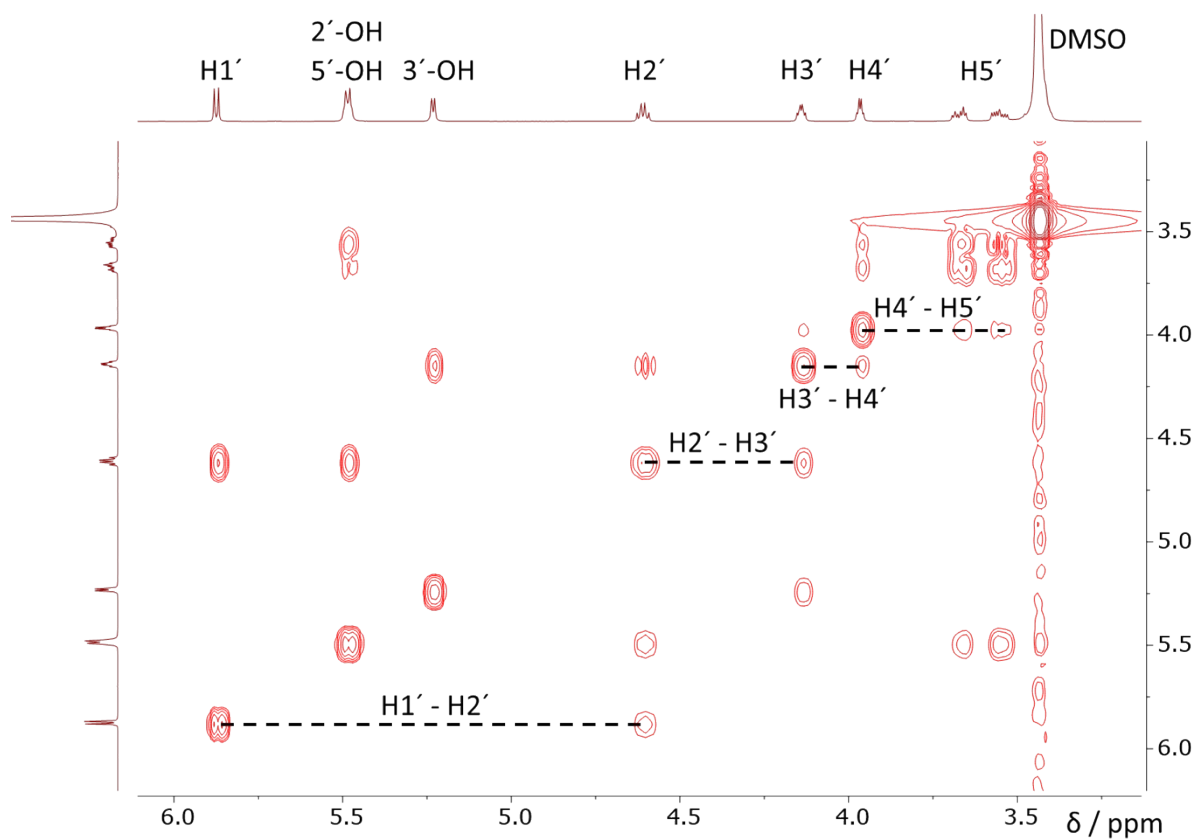

Figure S13. H,H-COSY spectrum of adenosine in  $\text{DMSO-}d_6$  with signal assignment.

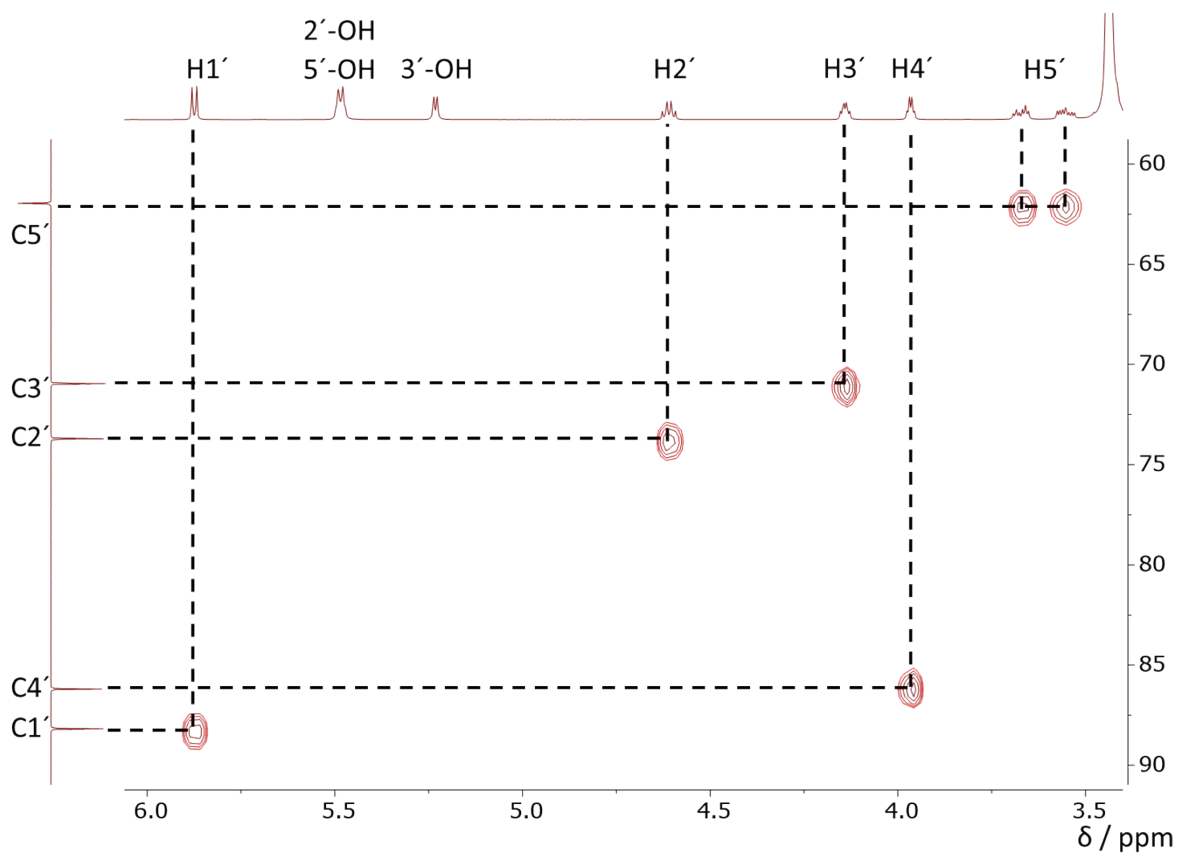

Figure S14. H,C-HSQC spectrum of adenosine in DMSO- $d_6$  with signal assignment.

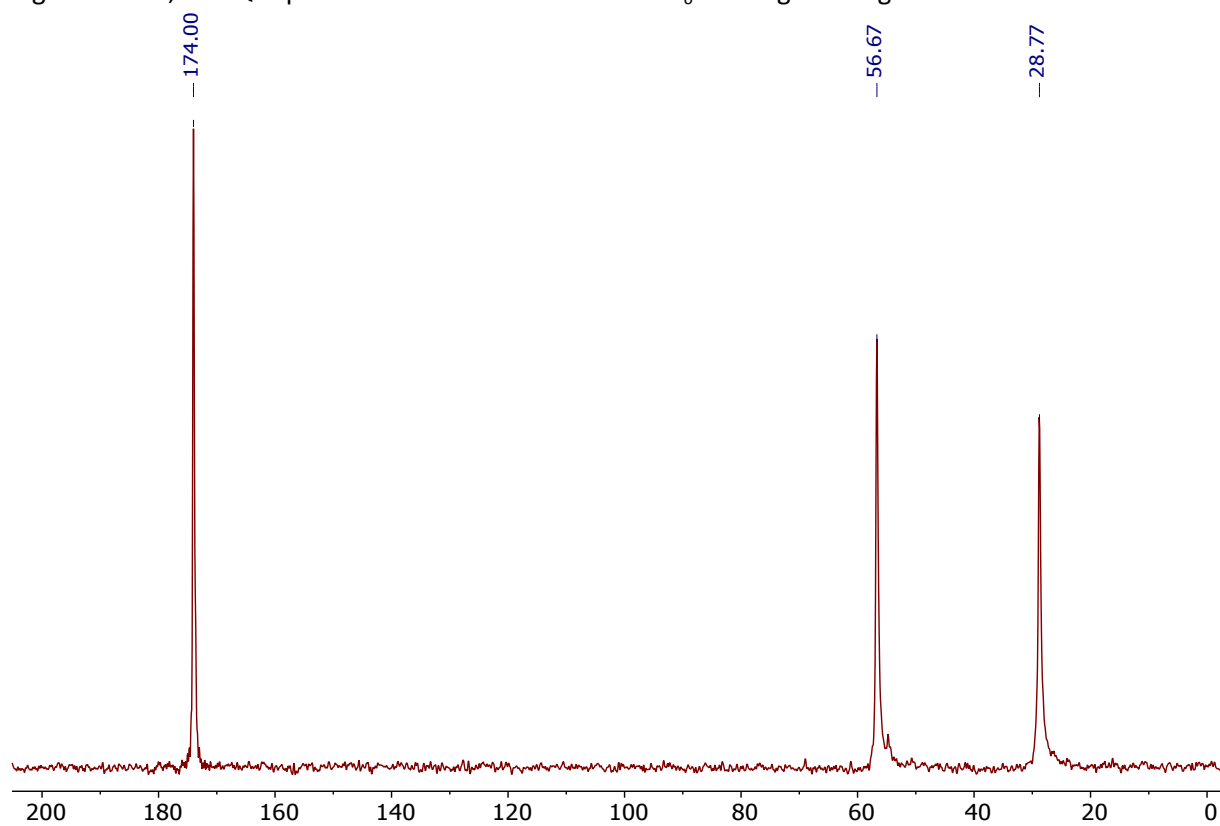

Figure S15.  $^{13}\text{C}$  CP-MAS spectrum of L-cysteine.

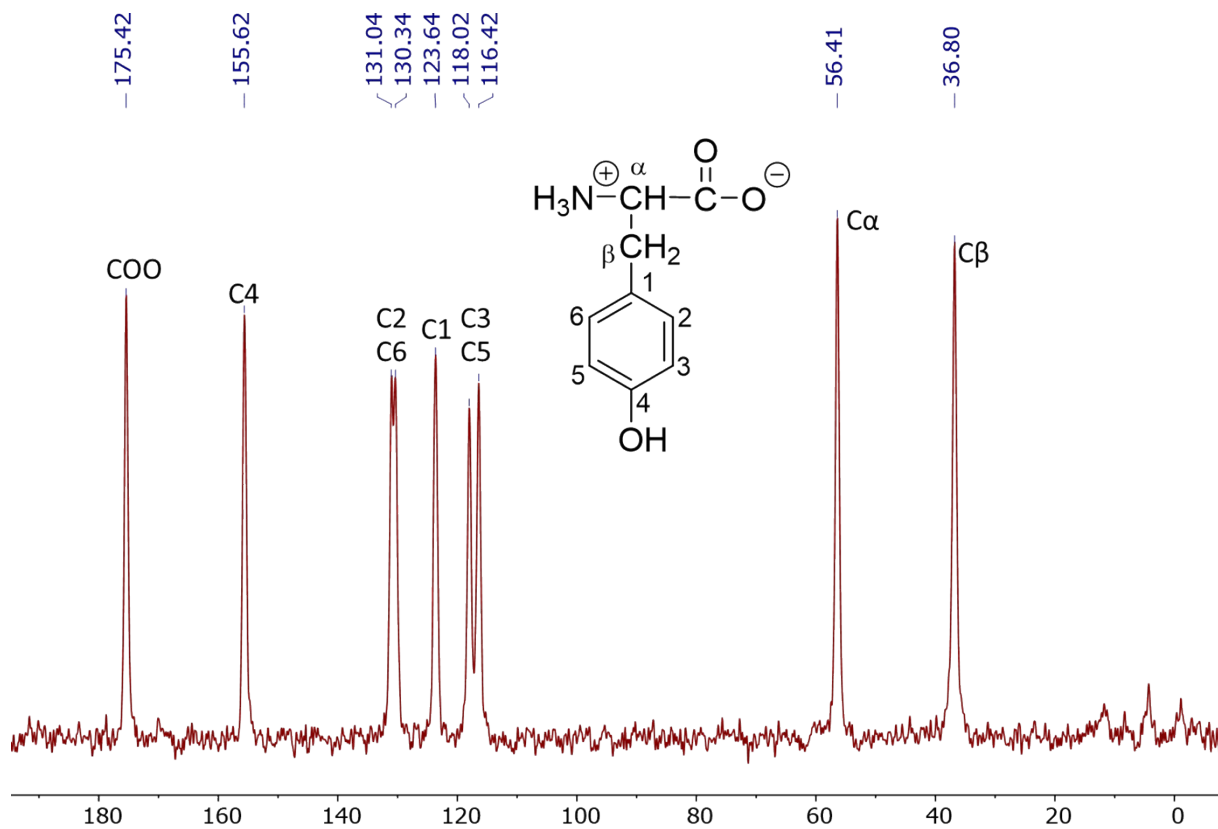

Figure S16.  $^{13}\text{C}$  CP-MAS spectrum of L-tyrosine

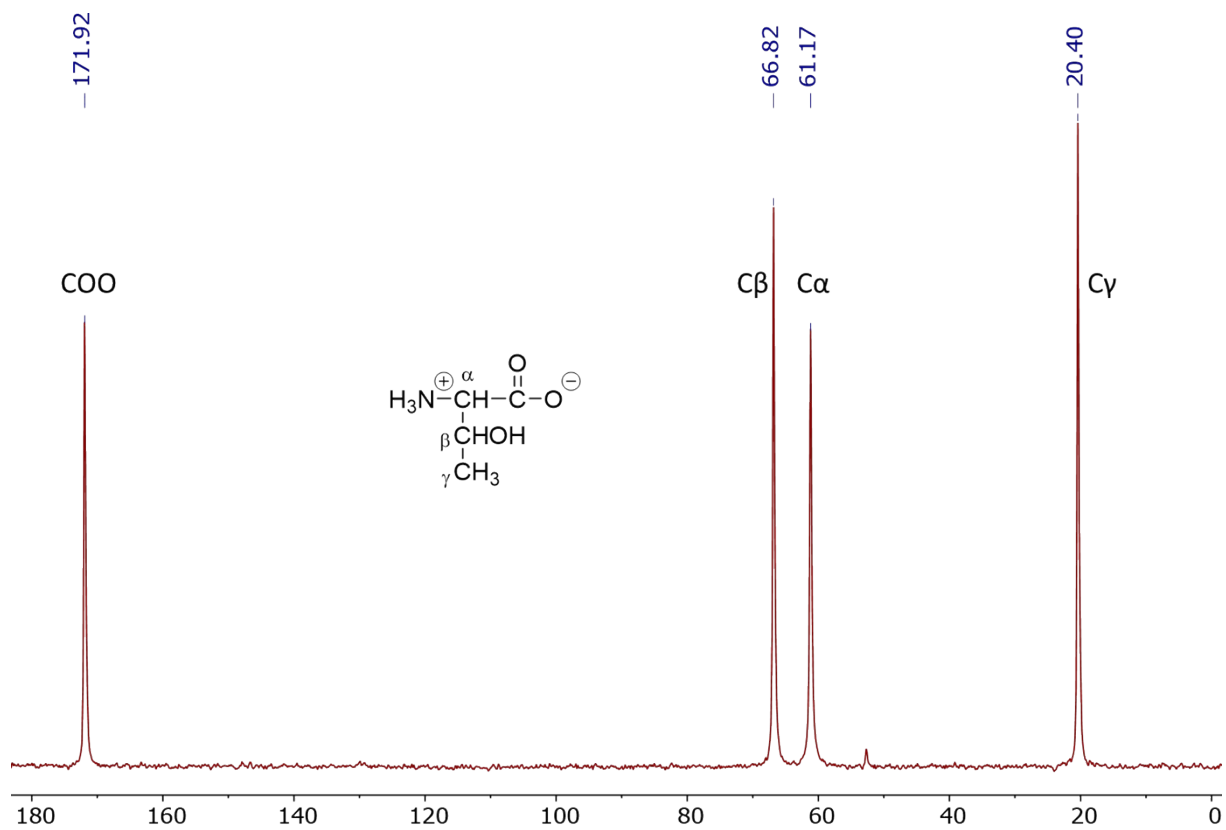

Figure S17.  $^{13}\text{C}$  CP-MAS spectrum of L-threonine.

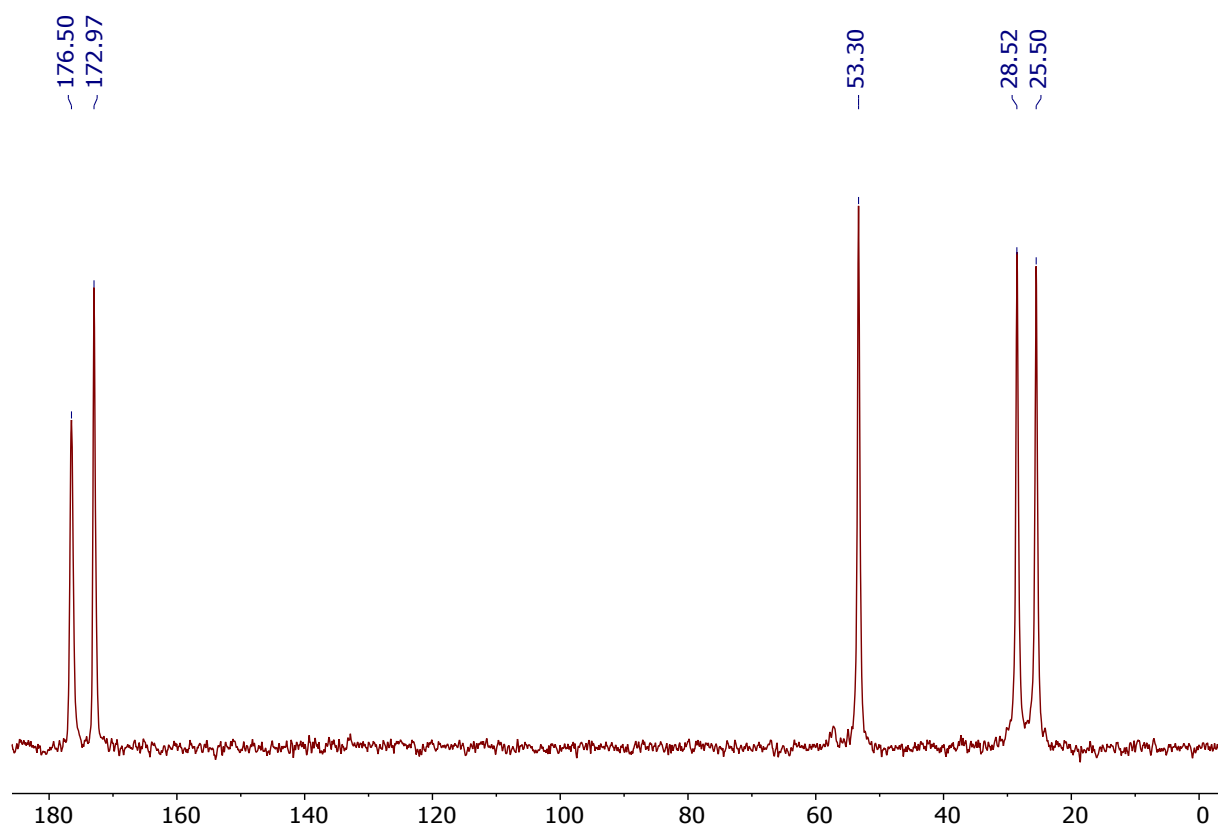

Figure S18.  $^{13}\text{C}$  CP-MAS spectrum of L-glutamine

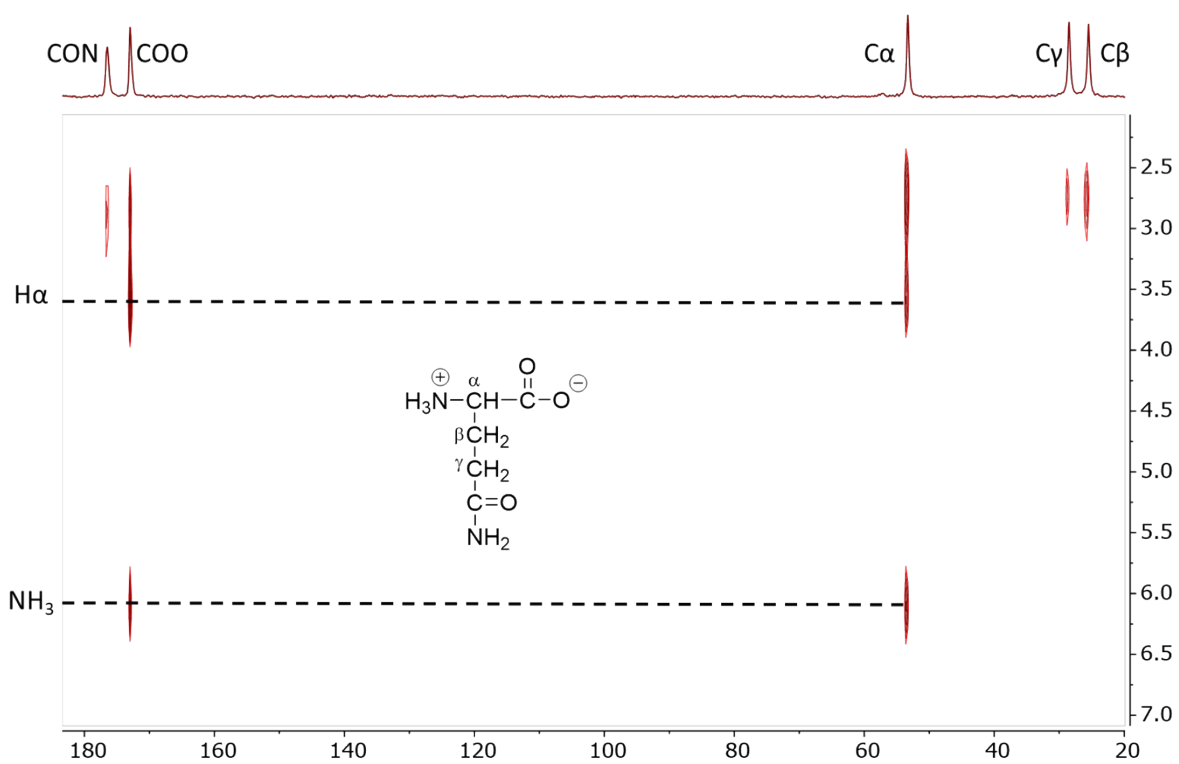

Figure S19. C,H-HETCOR spectrum of L-glutamine

Table S2: Mean absolute difference (MAD) and max difference in the predicted chemical shielding for corrections computed on the single molecule only versus the entire asymmetric unit and how those differences impact the agreement between predicted and experimental chemical shifts. Results here reflect only the multi-component crystals from the test sets. All values are in ppm.

|                | Shielding Correction |          | Error vs Experiment |           |                 |           |
|----------------|----------------------|----------|---------------------|-----------|-----------------|-----------|
|                | MAD                  | Max Diff | Molecule Only       |           | Asymmetric Unit |           |
|                |                      |          | MAE                 | Max Error | MAE             | Max Error |
| Carbon shift   | 0.02                 | 0.08     | 1.8                 | 2.9       | 1.8             | 2.9       |
| Carbon CSA     | 0.04                 | 0.16     | --                  | --        | --              | --        |
| Nitrogen shift | 1.8                  | 6.9      | 3.1                 | 8.3       | 3.4             | 9.1       |
| Oxygen shift   | 1.66                 | 6.25     | 3.3                 | 6.3       | 4.0             | 11.4      |
